# Supplementary material for: Rural pipeline and willingness to work in rural areas: Mixed method study on students in midwifery and obstetric nursing in Mali
Source: PubMed Central journal article supplement (PMC6733462; doi:10.1371/journal.pone.0222266), 2019-09-09
Supplement: pone.0222266.s001.pdf [file pone.0222266.s001.pdf]

## **Guide d'entretien étudiantes sages-femmes et Infirmières obstétriciennes en fin de cycle.**

Questionnaire N° \_\_\_\_\_/

Nom de l'enquêteur :

Date :

Nom de l'agent de saisie :

Date :

### **INTRODUCTION**

Chers Madame et Monsieur,

Nous vous sommes très reconnaissants de votre participation à cette enquête.

Je souhaiterais vous poser quelques questions sur votre travail, votre poste, votre profession et la perception que vous avez de votre environnement de travail. Voudrez bien répondre à chacune des questions en essayant d'être le plus franc et le plus précis possible en vous basant sur votre expérience.

***Merci beaucoup pour votre temps et vos efforts !***

**Identification de la structure de formation**

Région : \_\_\_\_\_

Cercle : \_\_\_\_\_

Nom de la Structure : \_\_\_\_\_

Nom du lieu d'implantation (ville/village/commune) : \_\_\_\_\_

Type de structure : \_\_\_\_\_

Profession (filère) :

Infirmière obstétricienne

Sage-Femme

**Début de l'entretien :**

**Fin de l'entretien :**

**Observation sur l'entretien (noter ce qui s'est passé qui a pu bloquer ou faciliter l'entretien)**

## **Données personnelles / Background**

1. Quelle est votre filière de formation ?
2. Quel âge avez-vous ?
3. Quelle est votre état matrimonial actuel ?
4. Quelle est votre lieu de naissance ?
5. Quelle est la profession de votre conjoint ?

## **Aspirations professionnelles et développement de carrière**

6. Que comptez-vous (que planifiez-vous de faire) après l'obtention de votre diplôme ?
7. Quelles sont vos aspirations professionnelles en tant que sage-femme ou infirmière obstétricienne ? (Objectifs de carrière)
8. Quelles sont vos préférences en termes de type et de lieu de travail (Public/privé ; urbain/rural ; Cscm/CSréf/hôpitaux etc) ?
9. Quelles sont vos stratégies pour trouver un emploi de votre convenance après votre formation ?
  - a. Comment vous vous informez ou comptez-vous vous informer par rapport aux postes vacants et offre d'emploi ?
  - b. Comment comptez-vous faire pour trouver un poste de votre préférence ?
  - c. Sur qui comptez-vous pour vous aider à trouver un emploi ?
  - d. Qu'attendez-vous des écoles ?
10. Quelles sont les difficultés que vous prévoyez et comment vous comptez les surmonter ?
11. Que pensez-vous du travail en milieu rural ?
12. Personnellement, qu'est ce qui pourrait vous inciter à aller travailler ou à rester travailler en milieu rural ? (Qu'est ce qu'il faudrait pour vous inciter à aller travailler ou à rester travailler en milieu rural ?).
