# Supplementary material for: Rural pipeline and willingness to work in rural areas: Mixed method study on students in midwifery and obstetric nursing in Mali
Source: PubMed Central journal article supplement (PMC6733462; doi:10.1371/journal.pone.0222266), 2019-09-09
Supplement: pone.0222266.s003.pdf [file pone.0222266.s003.pdf]

# Questionnaire étudiantes sages-femmes et Infirmières obstétriciennes en fin de cycle.

Questionnaire N° \_\_\_\_\_ / (alphanumérique, ex : Bko-000)

## INTRODUCTION

Chère Madame,

Nous vous sommes très reconnaissants de votre participation à cette enquête. L'étude vise à s'informer des conditions d'emploi des Sages-femmes et Infirmières obstétriciennes et des conditions qui affectent leur emploi.

### Comment remplir ce questionnaire

- Dans les pages qui suivent, vous trouverez un certain nombre questions et d'affirmations. Veuillez répondre à chacune des questions en cochant la case correspondante.
- Les réponses sont strictement personnelles
- Essayez d'être le plus précis possible en vous basant sur votre expérience.
- Veuillez répondre à toutes les questions s'il vous plait.

*Merci beaucoup pour votre temps et vos efforts !*

## Questionnaire N° \_\_\_\_\_ / (alphanumérique, ex : Bko-000)

Nom de l'enquêteur :

Date :

Nom de l'agent de saisie :

Date :

**Identification de la structure de formation**

Région :

Nom de la Structure :

Nom du lieu d'implantation (ville/village/commune) :

Type de structure :

 Publique Privée

Quelle est votre filière de formation ?

 Infirmière obstétricienne Sage-Femme**Données personnelles**1. Cocher la case correspondant au sexe du répondantFemme..... Homme..... 2. Quel âge avez-vous ?

Ans \_\_\_\_\_ (en années)

3. Quelle est votre état matrimonial actuel (*cocher la case correspondante*) ?N'a jamais été marié(e)..... Marié(e)..... Divorcé(e)..... Veuf/veuve..... 4. Quelle est votre lieu de naissance (*cocher la réponse qui s'applique à votre cas*) ? Bamako Chef-lieu de région (capitales régionales) Rural (cercle, commune, village) En dehors du Mali5. Où avez-vous fait vos études primaires (*cocher la réponse qui s'applique à votre cas*) ? Bamako Chef-lieu de région (capitales régionales) Rural (autre que chef-lieu de région) En dehors du Mali

6. Où avez-vous fait vos études secondaires (uniquement pour les sages-femmes) ?

 Bamako Chef-lieu de région (capitales régionales) Rural (autre que chef-lieu de région) En dehors du Mali

7. Quel est votre lieu de résidence habituellement ?

 Bamako Chef-lieu de région (capitales régionales) Rural (autre que chef-lieu de région) En dehors du Mali

8. Quelle est la profession de votre conjoint ? *(Seulement pour les personnes mariées)*

---

### Aspirations professionnelles

A présent j'aimerais vous poser quelques questions relatives à vos aspirations professionnelles générales.

#### Motivation pour le choix de la profession

9. Pourquoi avez-vous choisi de devenir sages-femmes/infirmière obstétricienne *(cocher les trois réponses qui se rapportent le plus à votre cas) ?*

- |                                                                     |                                                                    |
|---------------------------------------------------------------------|--------------------------------------------------------------------|
| <input type="checkbox"/> Amour de la profession                     | <input type="checkbox"/> Un emploi avec temps de travail flexible  |
| <input type="checkbox"/> Encouragement des autres                   | <input type="checkbox"/> Un emploi avec beaucoup de temps libre    |
| <input type="checkbox"/> La garantie d'avoir du travail             | <input type="checkbox"/> Un emploi avec contact humain             |
| <input type="checkbox"/> Salaire élevé                              | <input type="checkbox"/> Possibilités de travail à temps partiel   |
| <input type="checkbox"/> Bonnes possibilités de promotion           | <input type="checkbox"/> Un travail où vous pouvez créer et former |
| <input type="checkbox"/> Un travail où vous pouvez être indépendant | <input type="checkbox"/> Travail en équipe.                        |
| <input type="checkbox"/> Un travail où vous pouvez aider les autres | <input type="checkbox"/> Autres : _____                            |

10. Qu'est ce qui a influencé votre choix (à devenir sage-femme/infirmière obstétricienne *(cocher la réponse qui se rapporte à votre cas) ?*

- Parents (père, mère ; sœurs, frères)
- Conjoint (mari...)
- Professionnelles de santé
- Amis
- Autres étudiantes
- Personne
- Autres (à préciser) \_\_\_\_\_

#### Intention de travailler dans le domaine de la santé ou autre secteur

11. Avez-vous l'intention, à l'obtention de votre diplôme, de chercher du travail tout de suite ?

- Oui (si oui aller à la question 13)
- Non (si oui aller à la question 12)

12. Qu'aimeriez-vous faire (qu'avez-vous l'intention de faire) tout de suite après l'obtention de votre diplôme *(cocher la réponse qui se rapporte à votre cas) ?*

- Autres études
- Voyager
- Se marier
- Avoir des enfants
- Autres (préciser) \_\_\_\_\_

13. Avez-vous l'intention de travailler dans le domaine de la santé ?

- Oui (aller à la question 15)
- Non

14. Si non, dans quel domaine aimeriez-vous (avez-vous l'intention) de travailler ?

---

15. Où aimeriez-vous travailler *(cocher la réponse qui se rapporte à votre cas) ?*

- Bamako
- Hors Bamako

Autre (à préciser) \_\_\_\_\_

16. Dans quel secteur d'emploi préféreriez-vous travailler ?

- Public
- Privé

17. Quel type de statut préféreriez vous ?

- Fonctionnaire (état ou collectivité)
- Contractuel (ONG ou autre)
- Fonds Asaco
- Travaillez à votre propre compte
- Autres (à préciser) .....

18. Quel type d'emploi aimeriez-vous avoir ?

- Soins
- Autres (à préciser) \_\_\_\_\_

19. Dans quel type de structure/niveau de structure aimeriez-vous travailler ?

- Cscm
- CSRéf
- Hôpitaux
- Clinique (privées)
- Confessionnelle
- Autres (à préciser) \_\_\_\_\_

20. Quelles stratégies comptez-vous utiliser pour avoir du travail dans le domaine et le secteur que vous voulez ?

.....

.....

.....

.....

.....

Attentes en termes de développement de carrière

21. Combien de temps pensez-vous travailler comme sage-femme/Infirmière obstétricienne ?

- Moins de cinq ans
- Plus de cinq ans
- Je ne sais pas

22. Avez-vous l'intention d'entreprendre d'autres études?

- Oui
- Non

23. Si oui dans quel domaine avez-vous l'intention d'entreprendre ces études.

- Dans le domaine de la santé
- Autres domaine (préciser) \_\_\_\_\_
